# Supplementary material for: Salivary Glucose Detection with Laser Induced Graphene/AgNPs Non-Enzymatic Sensor
Source: MDPI journal article supplement (doi:10.3390/bios13020207), 2023-01-30
Supplement: s1 [file s1]

*Supplementary Information*

# Salivary Glucose Detection with Laser Induced Graphene/AgNPs Non-Enzymatic Sensor

Eider Pedro Aparicio-Martínez <sup>1</sup>, Alejandro Vega-Rios <sup>1</sup>, Velia Osuna <sup>2</sup> and Rocio Berenice Dominguez <sup>2,\*</sup>

<sup>1</sup> Centro de Investigación en Materiales Avanzados, SC, Miguel de Cervantes #120, Complejo Industrial Chihuahua, Chihuahua 31136, Mexico

<sup>2</sup> CONACyT-CIMAV, SC, Miguel de Cervantes #120, Complejo Industrial Chihuahua, Chihuahua 31136, Mexico

\* Correspondence: berenice.dominguez@cimav.edu.mx

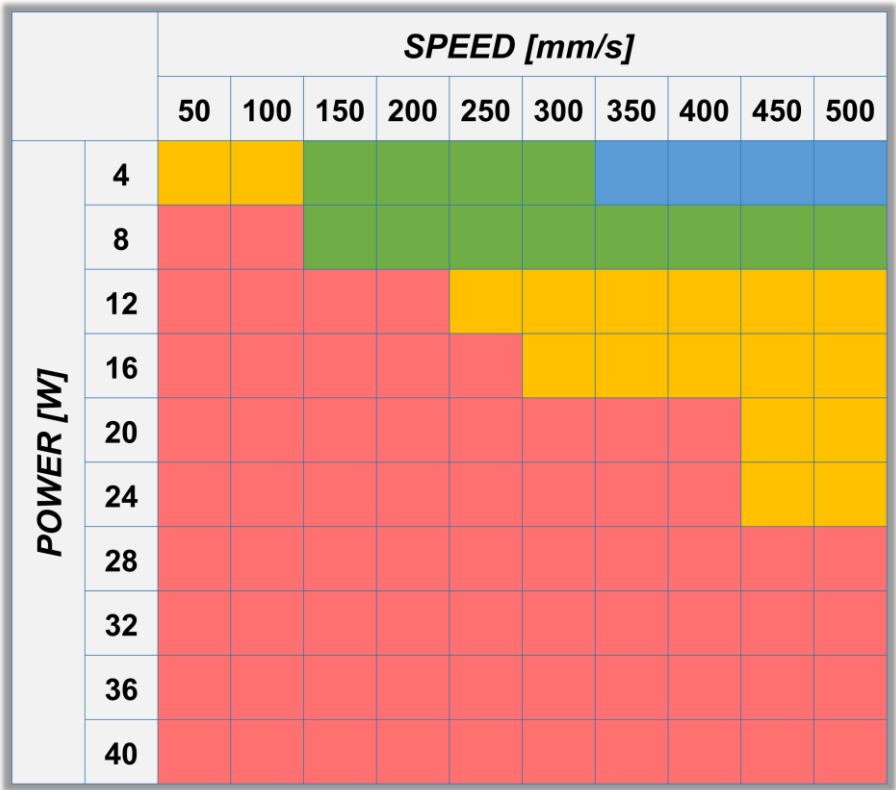

Figure S1. Processing conditions of power and speed for LIG production.

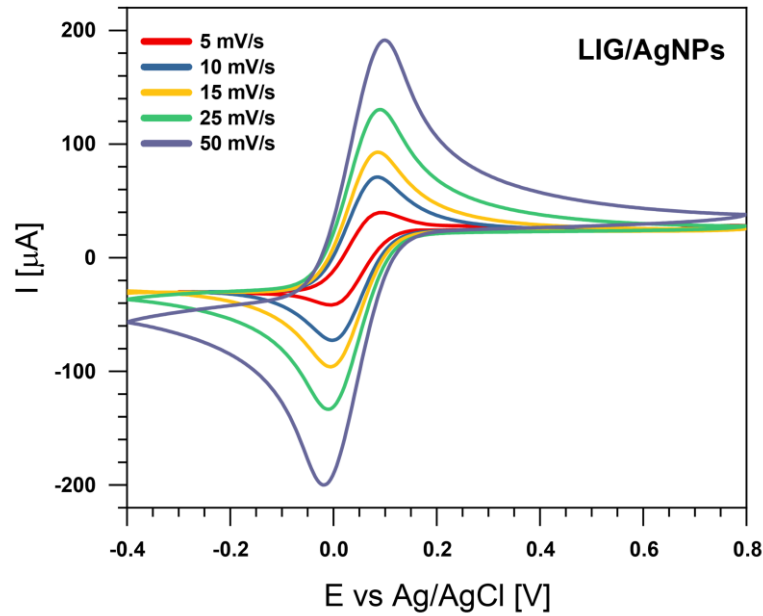

Figure S2. CV of LIG electrode with redox couple  $K_3[Fe (CN)_6]/K_4[Fe (CN)_6]$ .

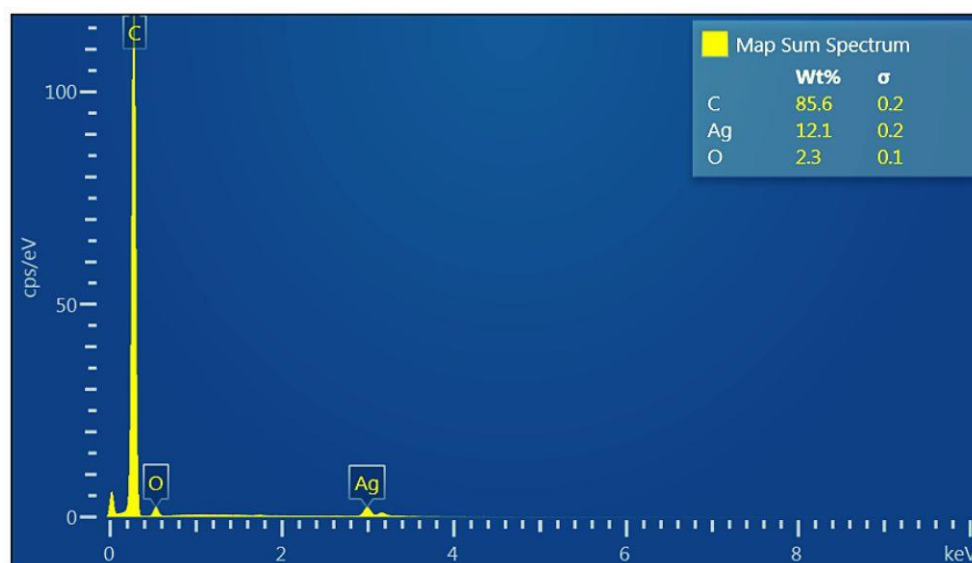

Figure S3. EDS specter of LIG/AgNPs non-enzymatic sensor.

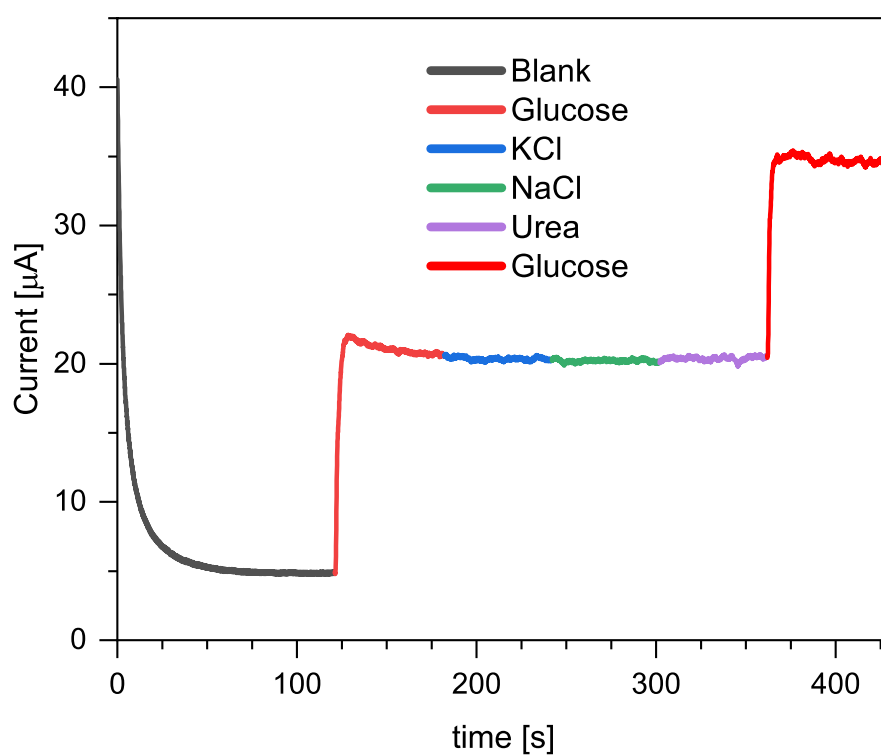

Figure S4. Interference analysis of LIG/AgNPs non-enzymatic sensor.
